# Supplementary material for: Cellulose nanopaper with polymeric nanoparticle additives – what is the role of nanoparticle surface functionality?
Source: Royal Society of Chemistry journal article supplement (doi:10.1039/d5nr03629a), 2025-01-01
Supplement: d5nr03629a1.pdf [file d5nr03629a1.pdf]

## Supporting Information

# Cellulose nanopapers with polymeric nanoparticle additives – what is the role of nanoparticle surface functionality?

Åsa Jerlhagen<sup>a,b</sup>, Korneliya Gordeyeva<sup>a,b</sup>, Vishnu Arumughan<sup>d</sup>, Lars Berglund<sup>a,b</sup> and Eva Malmström<sup>a,b,c\*</sup>

<sup>a</sup>KTH Royal Institute of Technology, Department of Fiber and Polymer Technology, School of Engineering Sciences in Chemistry, Biotechnology and Health, Teknikringen 56, SE-100 44 Stockholm, Sweden

<sup>b</sup>FibRe – Centre for Lignocellulose-based Thermoplastics, KTH Royal Institute of Technology, Department of Fiber and Polymer Technology, School of Engineering Sciences in Chemistry, Biotechnology and Health, Teknikringen 56, SE-100 44 Stockholm, Sweden

<sup>c</sup>Wallenberg Wood Science Center, Department of Fibre and Polymer Technology, KTH Royal Institute of Technology, Teknikringen 56-58, SE-100 44 Stockholm, Sweden

<sup>d</sup>Department of Bioproducts and Biosystems, Aalto University, Vuorimiehentie 1, 02150 Espoo, Finland

\* corresponding author: [mavem@kth.se](mailto:mavem@kth.se)

## Table of contents

1. Synthesis of macroCTAs
  - a. Formulations macroCTA
  - b. Synthesis of macroCTA\_A
  - c. Synthesis of macroCTA\_G
  - d. Synthesis of macroCTA\_O
2. Polymerization-induced self-assembly (PISA)
  - a. Formulations PISA
  - b. PISA – polymer characterization
  - c. PISA – colloidal characterization
3. Preparation of CNFs
4. Fabrication of nanopapers
  - a. Formulations nanopapers
  - b. Characterization of nanopapers

## 1. Synthesis of macroCTAs

The water-soluble oligomeric block responsible for nanoparticle stabilization (macroCTA) is synthesized in solution polymerization. The polymers are purified through dialysis or precipitation before chain extended in emulsion polymerization.

### 1.1 Formulations macroCTA

**Table S1.** MacroCTAs and their formulations.

|        | CTPPA  | monomer        | initiator   | solvent | monomer | monomer | rxn time | conversion |
|--------|--------|----------------|-------------|---------|---------|---------|----------|------------|
|        | mg, eq | ml, mg, eq     | mg, eq      | ml      | vol %   | [M]     | hr       | %          |
| PMAA   | 832; 1 | 6.33; 6457; 25 | 84; 0.1     | 23.7    | 21      | 2.5     | 4        | 95         |
| PGMA   | 334; 1 | NA; 5304; 25   | 33.75; 0.12 | 18      | 8.6     | 1.3     | 4        | 98         |
| POEGMA | 111; 1 | 4.76; 5000; 25 | 11; 0.1     | 15.2    | 24      | 0.5     | 20       | 97         |

RAFT agent CTPPA, initiator ACVA, monomer conversion calculated by  $^1\text{H}$  NMR.

### 1.2 Synthesis of macroCTA\_A: (MAA)<sub>25</sub>-CTPPA

In this section we detail the synthesis of the hydrophilic block used in PISA to make particles with anionic poly(methacrylic acid) shell surface.

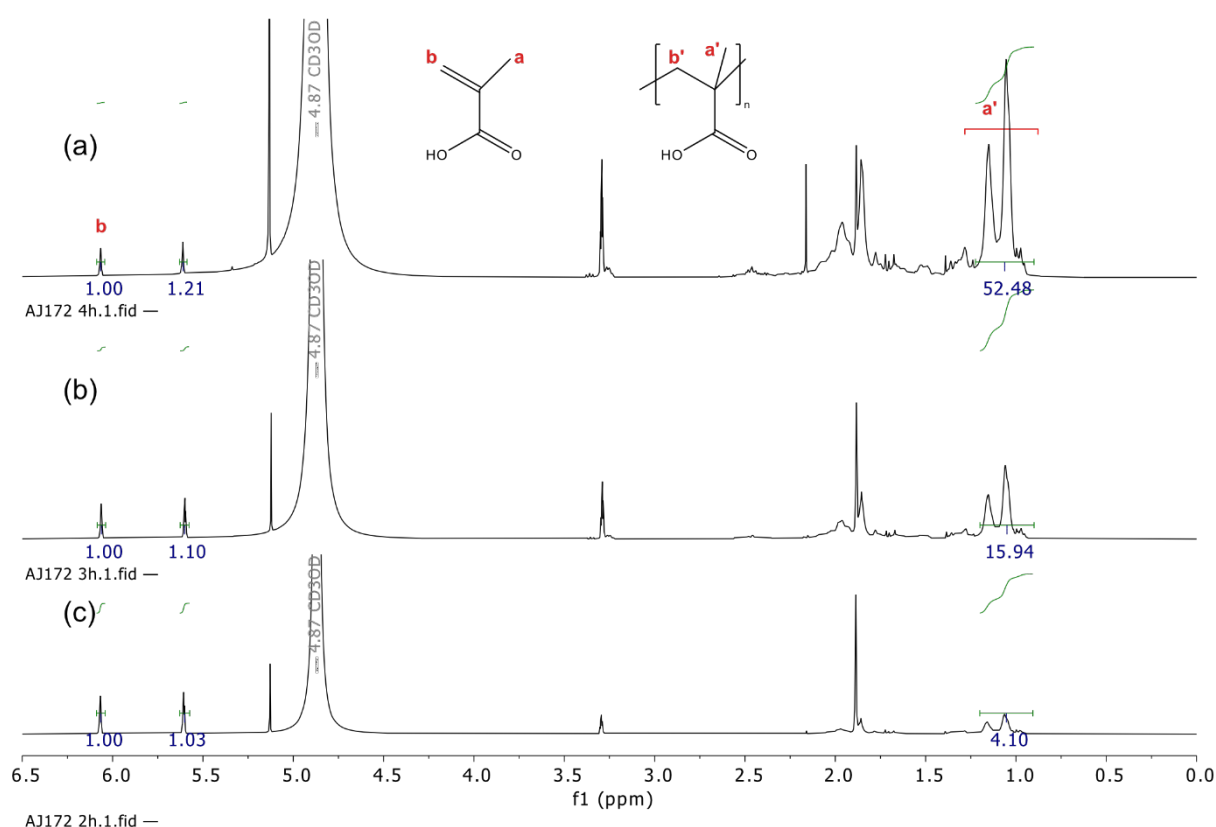

**Figure S1.** RAFT polymerization of methacrylic acid (MAA) in water for (a) 4, (b) 3 and (c) 2 hours. Spectra in deuterated methanol  $\text{CD}_3\text{OD}$ , with an aliquot of the crude reaction mixture at each time point.

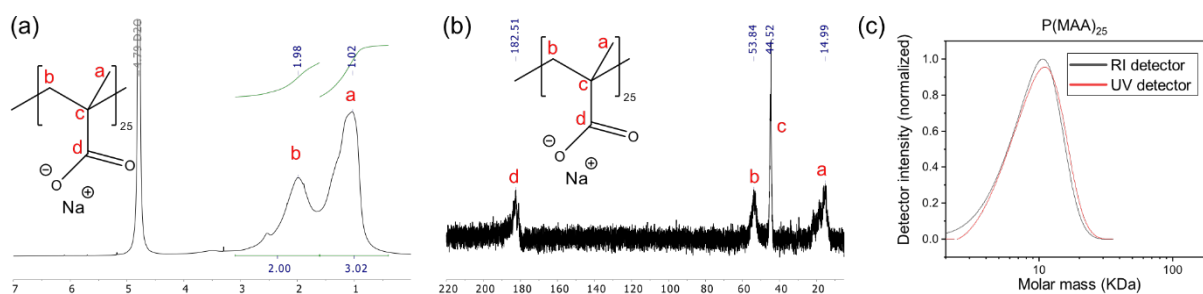

**Figure S2.** Purified macroCTA poly(methacrylic acid)-CTPPA (PMAA).  $^1\text{H}$ -NMR (a),  $^{13}\text{C}$ -NMR in  $\text{D}_2\text{O}$  (b) and (c) size exclusion chromatography in DMSO, showing refractive index (RI) signal and UV signal (280 nm) confirming trithiocarbonate moiety on chains throughout distribution. The polymer end-groups are not visible in  $^1\text{H}$  or  $^{13}\text{C}$  NMR.

**Table S2.** DMSO-SEC values from methylated and non-methylated anionic macroCTA\_A (mCTA).

| Target M.W. | mCTA_A (RI-DMSO) |           | mCTA_A (UV-DMSO) |           | mCTA_A-me (RI-DMSO) |           | mCTA_A-me (RI-DMF) |           |
|-------------|------------------|-----------|------------------|-----------|---------------------|-----------|--------------------|-----------|
|             | $M_n$            | $\bar{D}$ | $M_n$            | $\bar{D}$ | $M_n$               | $\bar{D}$ | $M_n$              | $\bar{D}$ |
| kDa         | kDa              | -         | kDa              |           | kDa                 | -         | kDa                | -         |
| 2.4         | 7.7              | 1.26      | 8.6              | 1.20      | 4.3                 | 1.38      | 4.0                | 1.28      |

### 1.3 Synthesis of macroCTA\_G: (GMA)<sub>25</sub>-CTPPA

In this section we detail the synthesis of the hydrophilic block used in PISA to make particles with non-ionic poly(glycerol monomethacrylate) shell surface.

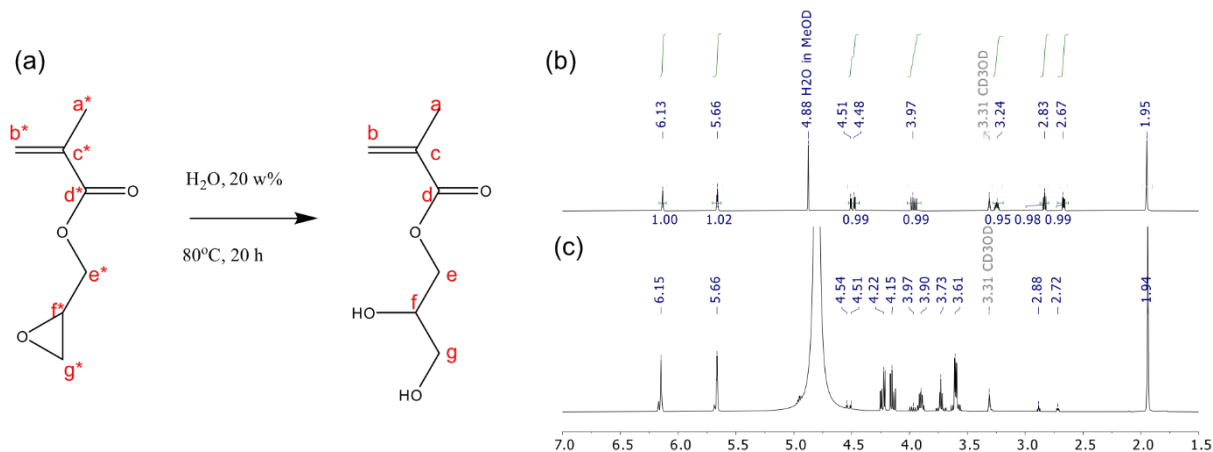

**Figure S3.** (a) Synthesis of glycerol methacrylate (GMA) by hydrolysis of glycerol methacrylate (GlyMA). (b) Glycerol methacrylate starting material, and (c) hydrolysis product into GMA with conversion ~84%.

**Table S3.** Assignments and integrals of GlyMA and GMA.

| Peak | GlyMA     |          | GMA      |          |
|------|-----------|----------|----------|----------|
| ppm  | assign.   | integral | assign.  | integral |
| 6.13 | <b>b*</b> | <b>1</b> | <b>b</b> | 1.24     |
| 5.66 | <b>b*</b> |          | <b>b</b> | 1.35     |
| 4.51 | <b>e*</b> | 0.99     | -        | -        |
| 4.48 | <b>e*</b> |          | -        | -        |
| 4.21 | -         | -        | <b>e</b> | 1.06     |
| 4.15 | -         | -        | <b>e</b> | 1.04     |
| 3.97 | <b>e*</b> | 0.99     | -        | 0.19     |
| 3.90 | -         | -        | <b>f</b> | <b>1</b> |
| 3.73 | -         | -        | -        | 0.85     |
| 3.61 | -         | -        | <b>g</b> | 2.03     |
| 3.24 | <b>f*</b> | 0.95     | -        | -        |
| 2.83 | <b>g*</b> | 0.98     | -        | 0.13     |
| 2.67 | <b>g*</b> | 0.99     | -        | 0.13     |
| 1.95 | <b>a*</b> | 3.05     | <b>a</b> | 3.68     |

Conversion ~84% calculated from signals **e\*** and **f** at 3.97 and 3.90 ppm.

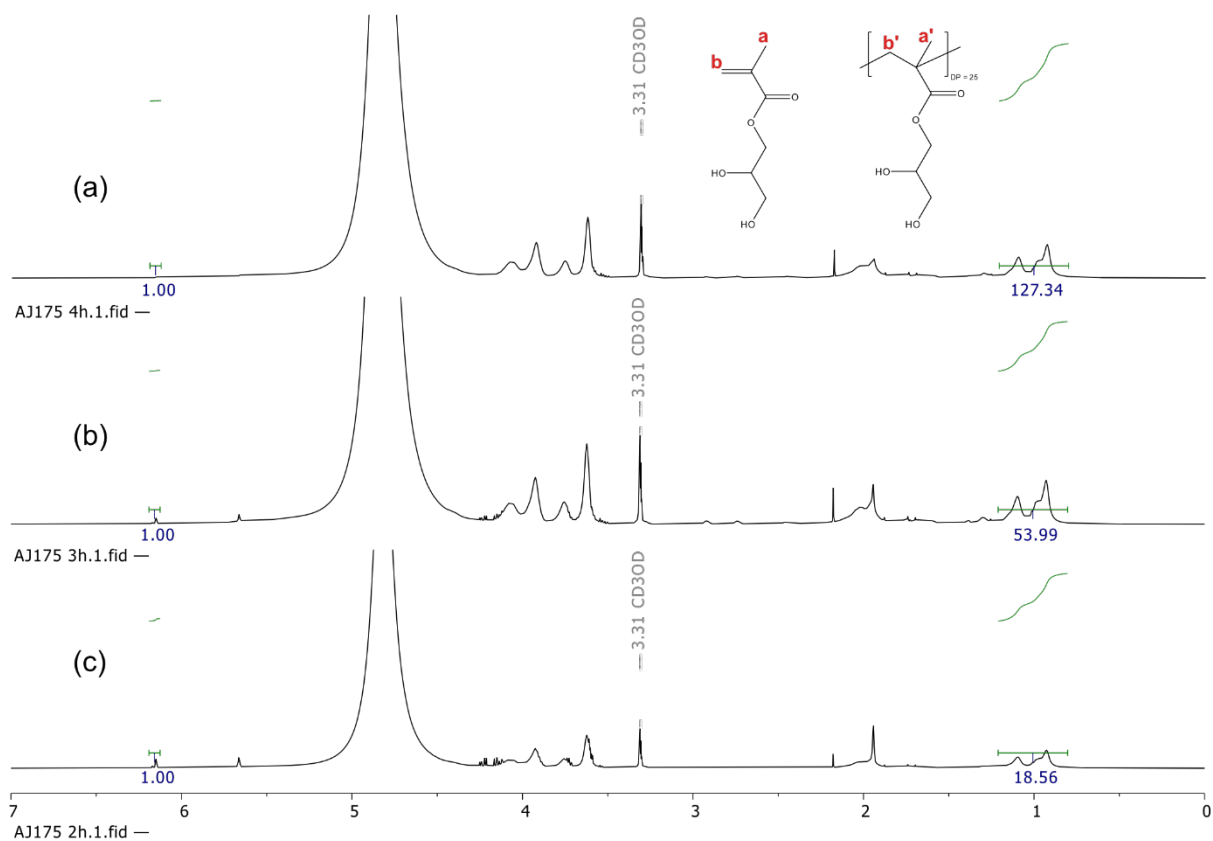

**Figure S4.** RAFT polymerization of glycerol monomethacrylate (GMA) in water for (a) 4, (b) 3 and (c) 2 hours. Spectra in deuterated methanol CD<sub>3</sub>OD.

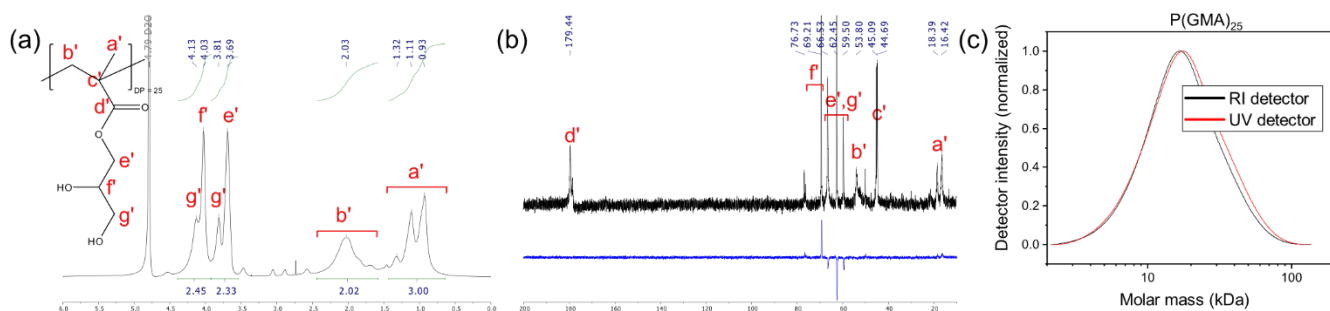

**Figure S5.** Purified macroCTA poly(glycerol monomethacrylate)-CTPPA (PGMA).  $^1\text{H}$ -NMR (a),  $^{13}\text{C}$ -NMR in  $\text{D}_2\text{O}$  (b) and (c) size exclusion chromatography in DMSO, showing refractive index (RI) signal and UV signal (280 nm) confirming trithiocarbonate moiety on chains throughout distribution. The polymer end-groups are not visible in  $^1\text{H}$  or  $^{13}\text{C}$  NMR.

## 1.4 Synthesis of macroCTA\_O: (OEGMA<sub>500</sub>)<sub>25</sub>-CTPPA

In this section we detail the synthesis of the hydrophilic block used in PISA to make particles with polymeric/brush-type poly(ethylene glycol) shell surface.

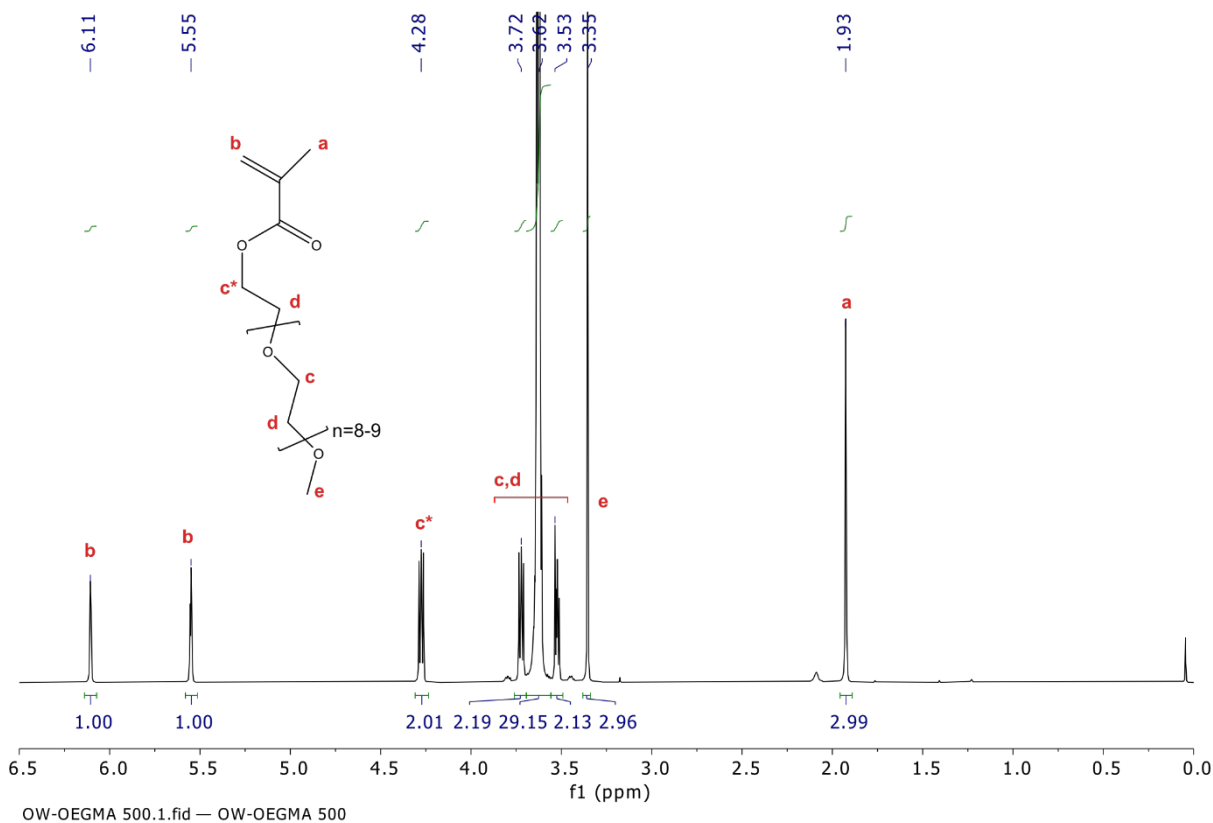

**Figure S6.** Commercial monomer of oligoethylene glycol methacrylate (OEGMA) with reported average molecular weight 500  $\text{g mol}^{-1}$ .  $^1\text{H}$ NMR of monomer shows a degree of polymerization (DP) of 8.9, i.e.  $M_n$  of 465  $\text{g mol}^{-1}$ .

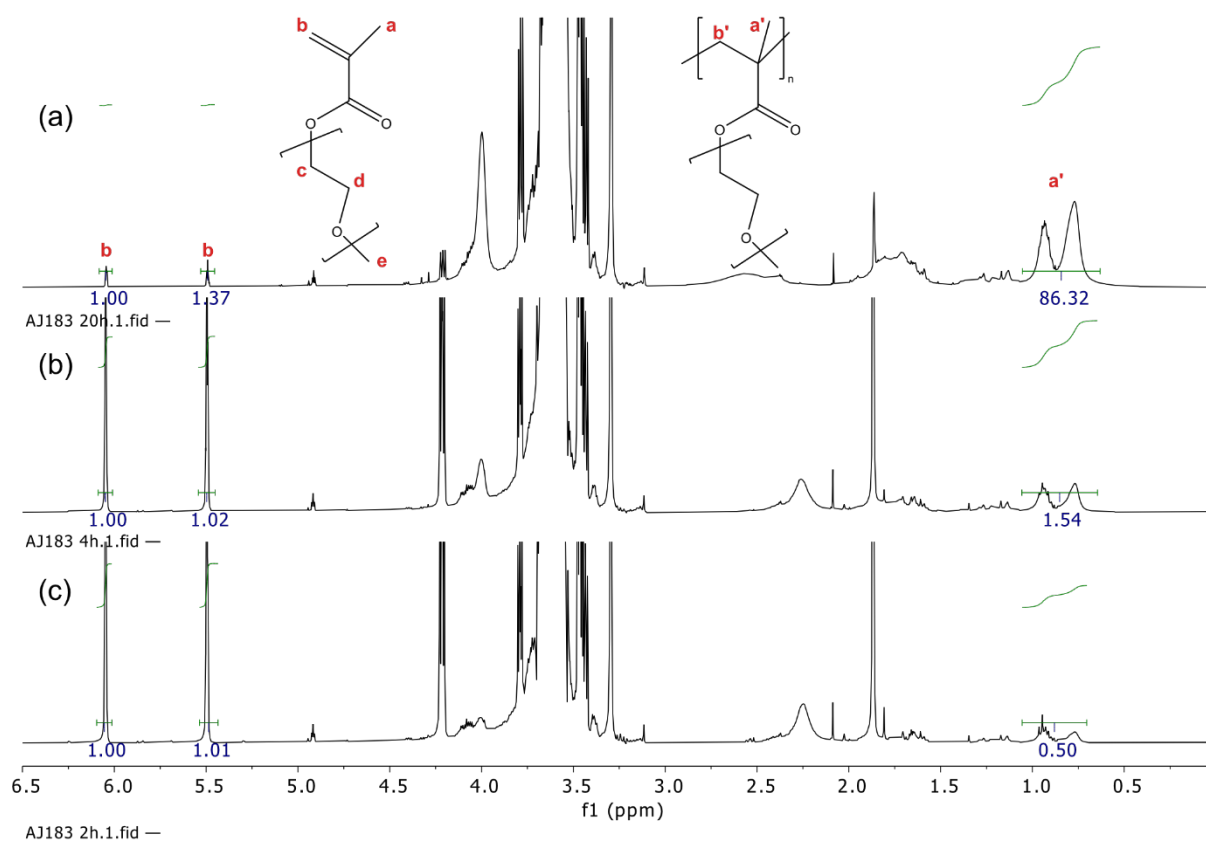

**Figure S7.** RAFT polymerization of OEGMA500 in 1,4-dioxane for (a) 20, (b) 4 and (c) 2 hours. Spectra in  $\text{CDCl}_3$ .

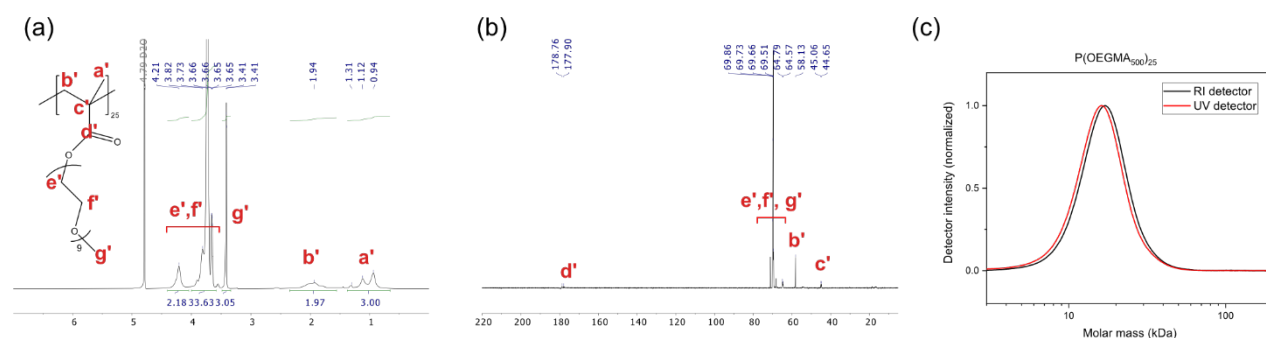

**Figure S8.** Purified macroCTA poly(oligoethylene glycol)-CTPPA (POEGMA).  $^1\text{H}$ -NMR (a),  $^{13}\text{C}$ -NMR in  $\text{D}_2\text{O}$  (b) and (c) size exclusion chromatography in DMSO, showing refractive index (RI) signal and UV signal (280 nm) confirming trithiocarbonate moiety on chains throughout distribution. The polymer end-groups are not visible in  $^1\text{H}$  or  $^{13}\text{C}$  NMR.

**Table S4.** DMSO-SEC values from poly(glycerol monomethacrylate) macroCTA\_A (mCTA).

| mCTA_O (RI-DMSO) |           | mCTA_O (UV-DMSO) |           | mCTA_O (RI-DMF) |           |
|------------------|-----------|------------------|-----------|-----------------|-----------|
| $M_n$            | $\bar{D}$ | $M_n$            | $\bar{D}$ | $M_n$           | $\bar{D}$ |
| 15.3             | 1.17      | 14.3             | 1.18      | 12.8            | 1.18      |

## 2. Polymerization-induced self-assembly (PISA)

### 2.1 Formulations PISA

**Table S5.** Formulations of block copolymers made through polymerization-induced self-assembly (PISA).

|      | macroCTA | MMA            | initiator  | solvent | dry content | monomer | rxn time | conversion |
|------|----------|----------------|------------|---------|-------------|---------|----------|------------|
|      | mg, eq   | ml, mg, eq     | mg, eq     | ml      | wt%         | [M]     | hr       | %          |
| np_A | 228, 1   | 2.0, 1880, 200 | 3.16, 0.12 | 19      | 10          | 0.54    | 5        | 93         |
| np_G | 659, 1   | 1.5, 1410, 100 | 4.74, 0.12 | 18.7    | 10          | 0.7     | 4        | 93         |
| np_O | 900, 1   | 1.5, 1410, 200 | 2.37, 0.12 | 20.8    | 10          | 0.63    | 4        | >80        |

### 2.2 Polymerization-induced self-assembly (PISA) – polymer characterization

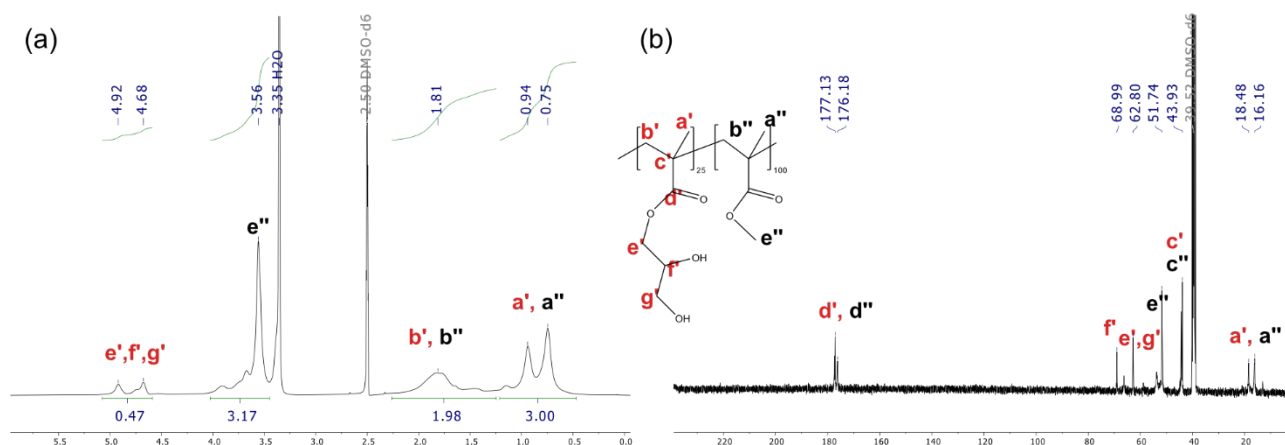

**Figure S9.** (a)  $^1\text{H}$  NMR of the P(GMA)-b-P(MMA) block copolymer made through RAFT-PISA.

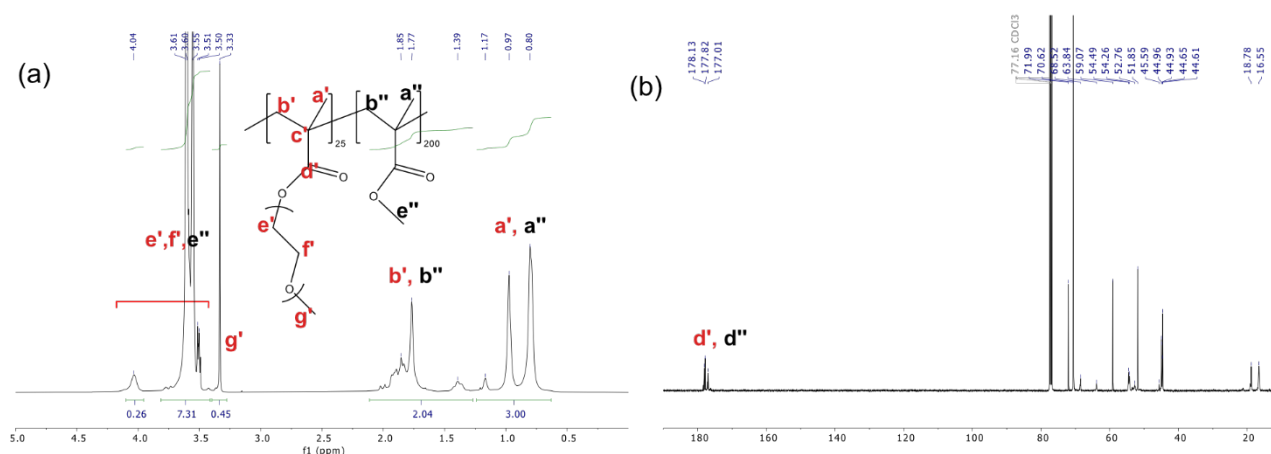

**Figure S10.** (a)  $^1\text{H}$  NMR of the  $P(\text{OEGMA})$ - $b$ - $P(\text{MMA})$  block copolymer made through RAFT-PISA. The ratio between OEGMA and MMA units is calculated from the methyl signals at 1.2-0.8 ppm vs. the methyl signal at 3.33 ppm belonging only to OEGMA. (b)  $^{13}\text{C}$  NMR of the block copolymer.

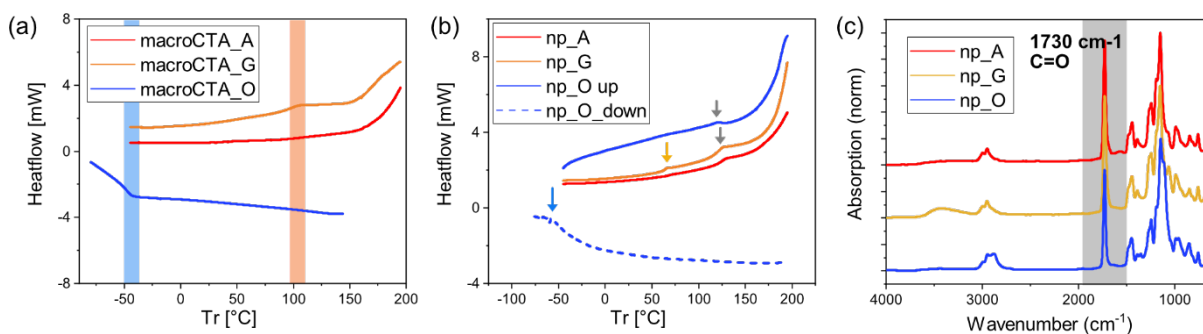

**Figure S11.** (a) DSC curves of macroCTAs, (b) DSC curves of nanoparticles, and (c) ATR-FTIR of all nanoparticles made through RAFT-PISA.

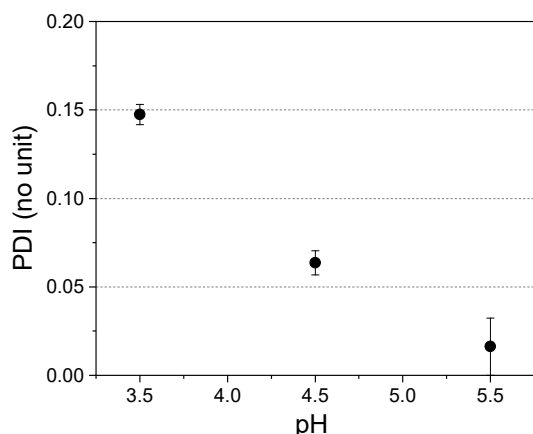

**Figure S12.** Influence of pH on PISA of macroCTA\_A shows the importance of pH and ionization to achieve low PDI (ie size dispersity).



## 2.2 Polymerization-induced self-assembly (PISA) – colloidal characterization

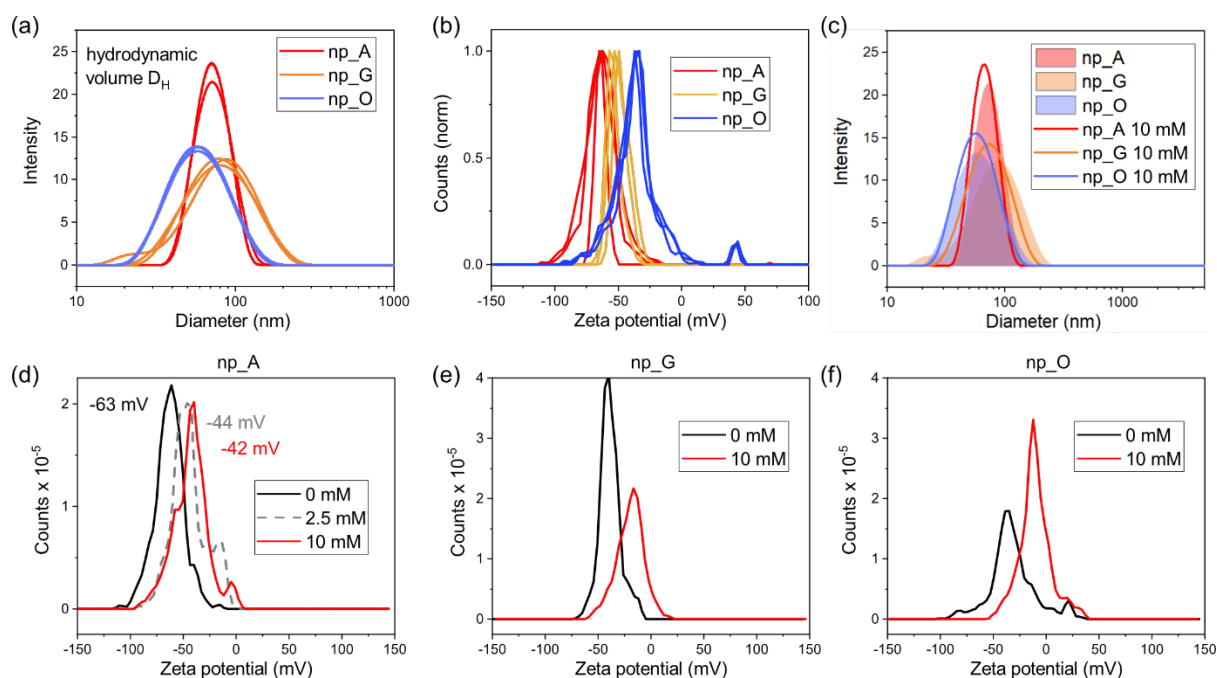

**Figure S13.** DLS and zeta potential of colloidal nanoparticles. (a) hydrodynamic diameters and distributions from DLS, (b) zeta potential distributions, (c) influence of buffer (10 mM) on particle size, (d-f) influence of buffer (10 mM) on zeta potential.

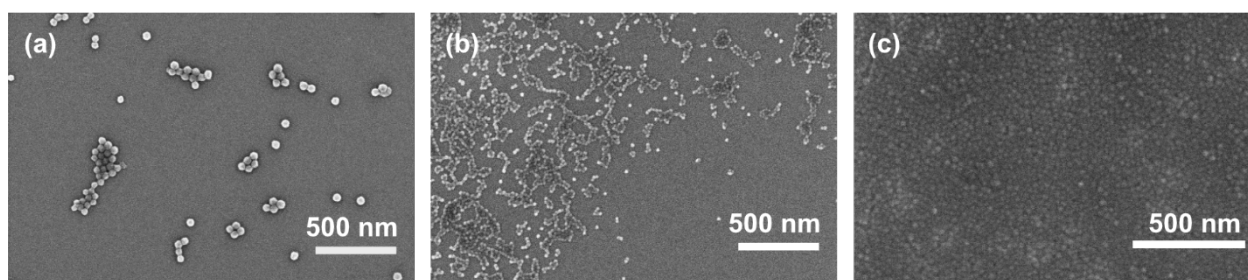

**Figure S14.** FE-SEM of polymeric nanoparticles cast on silicon wafer. (a) anionic MAA particles, (b) glycerol-functional particles and (c) PEG/OEGMA functional particles. The sizes of nanoparticles are analyzed in ImageJ and reported as  $D_{SEM}$  in the main manuscript.

## 3. Preparation of cellulose nanofibrils (CNFs)

### 3.1 Preparation of cellulose nanofibrils (CNFs)

**Table S6.** Characterization of CNFs

| Surface charge             |
|----------------------------|
| ( $\mu\text{mol g}^{-1}$ ) |
| $770 \pm 10$               |

## 4. Fabrication of nanopapers

### 4.1 Formulations nanopapers

**Table S7.** Details of the hybrid nanopapers fabricated in this study.

| Sample name | Latex<br>(wt%) | CNF disp.<br>2.77 g L <sup>-1</sup><br>(ml) | Water<br>(ml) | Latex disp.<br>(ml) | Buffer<br>molarity in<br>latex<br>(mM) | Buffer<br>molarity<br>total<br>(mM) |
|-------------|----------------|---------------------------------------------|---------------|---------------------|----------------------------------------|-------------------------------------|
| CNF         | 0              | 88.19                                       | 33.95         | 0.00                | -                                      | 0                                   |
| CNF_A_0.5   | 0.5            | 87.75                                       | 33.78         | 0.61                | 10                                     | 0.1                                 |
| CNF_A_25    | 25             | 66.14                                       | 25.46         | 30.54               | 10                                     | 2.5                                 |
| CNF_O_0.5   | 0.5            | 87.75                                       | 33.78         | 0.61                | 10                                     | 0.1                                 |
| CNF_O_25    | 25             | 66.14                                       | 25.46         | 30.54               | 10                                     | 2.5                                 |
| CNF_G_0.5   | 0.5            | 87.75                                       | 33.78         | 0.61                | 10                                     | 0.1                                 |
| CNF_G_25    | 25             | 66.14                                       | 25.46         | 30.54               | 10                                     | 2.5                                 |
| CNF_A_25_B0 | 25             | 66.14                                       | 25.46         | 30.54               | 0                                      | 0                                   |
| CNF_G_25_B0 | 25             | 66.14                                       | 25.46         | 30.54               | 0                                      | 0                                   |

Hybrid dispersions are made, keeping dry content 2 g L<sup>-1</sup> constant and with varying ratios between CNF and latex. CNF dispersion with dry content 2.77 g L<sup>-1</sup> is diluted with distilled water. The latex is diluted in phosphate buffer to 1 g L<sup>-1</sup> before use, the total buffer content in hybrid dispersion is shown.

### 4.2 Characterization of nanopapers

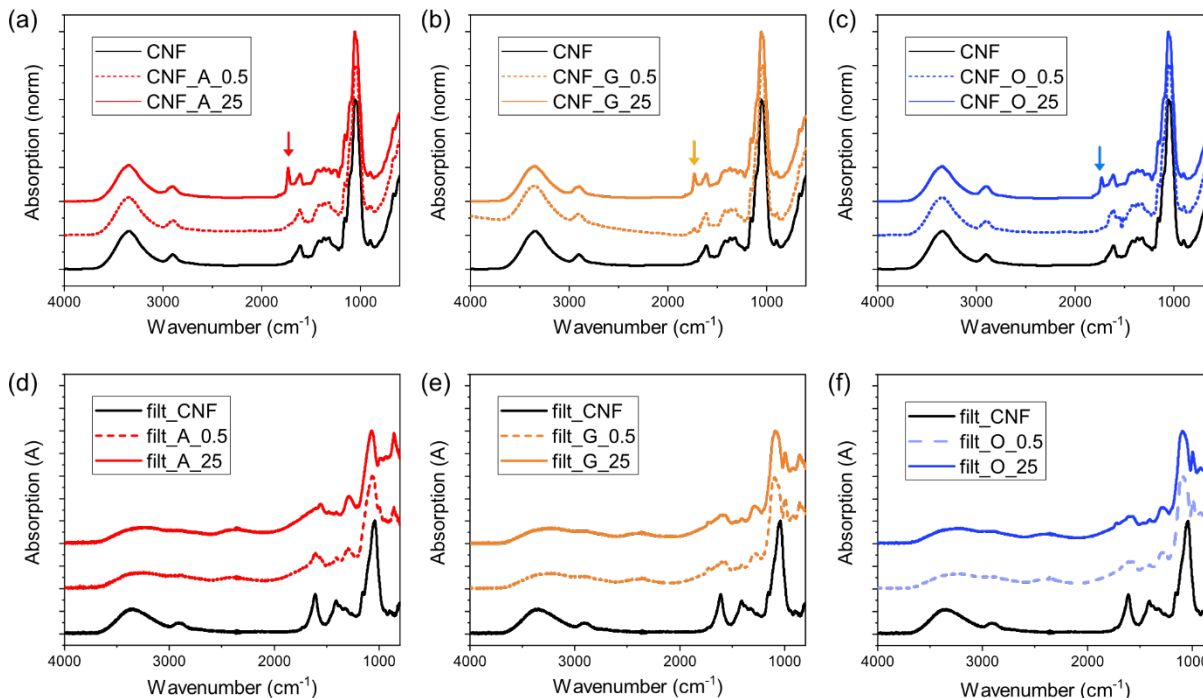

**Figure S15.** FTIR of nanopapers and filtrate. (a-c) FTIR-ATR of CNF sheet surfaces, and (d-f) FTIR-ATR of freeze dried filtrate waters.

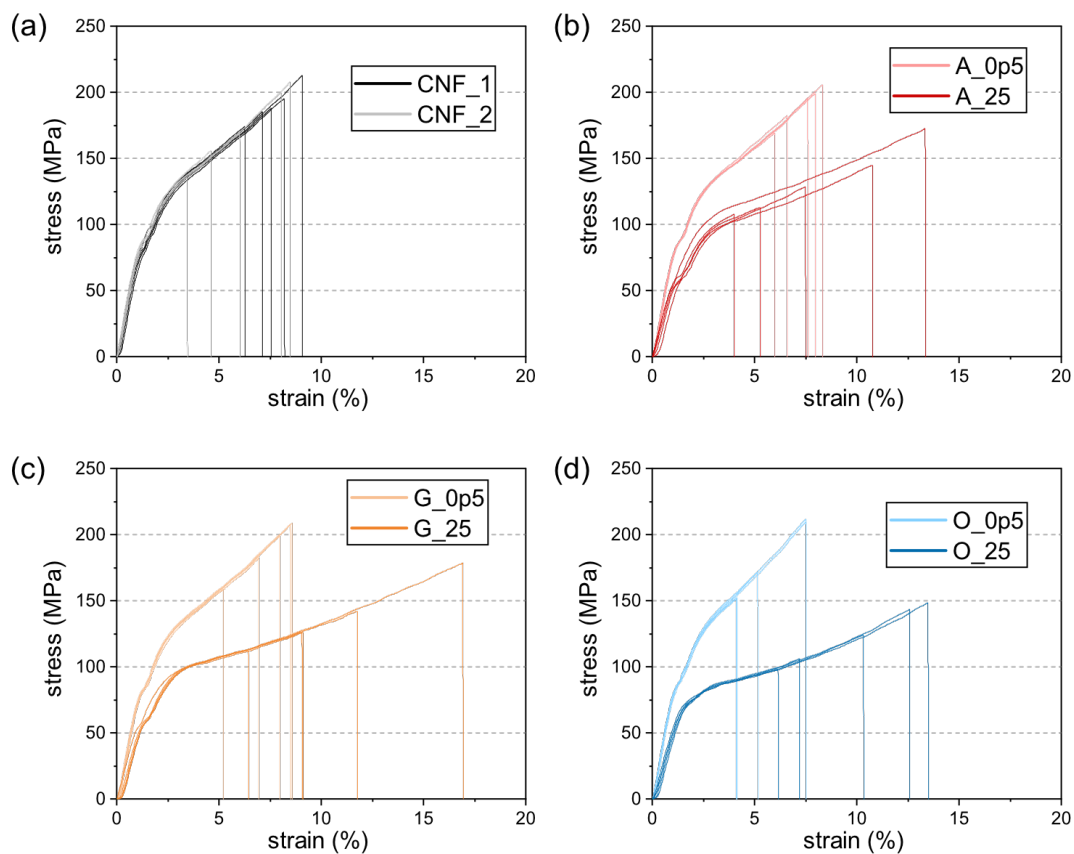

**Figure S 16.** Stress-strain curves for nanopapers (a) CNF reference (CNF\_1 and CNF\_2 are two different nanopapers), (b) nanopapers made with np\_A and buffer, (c) nanopapers made with np\_G and buffer, and (d) nanopapers made with np\_O and buffer.

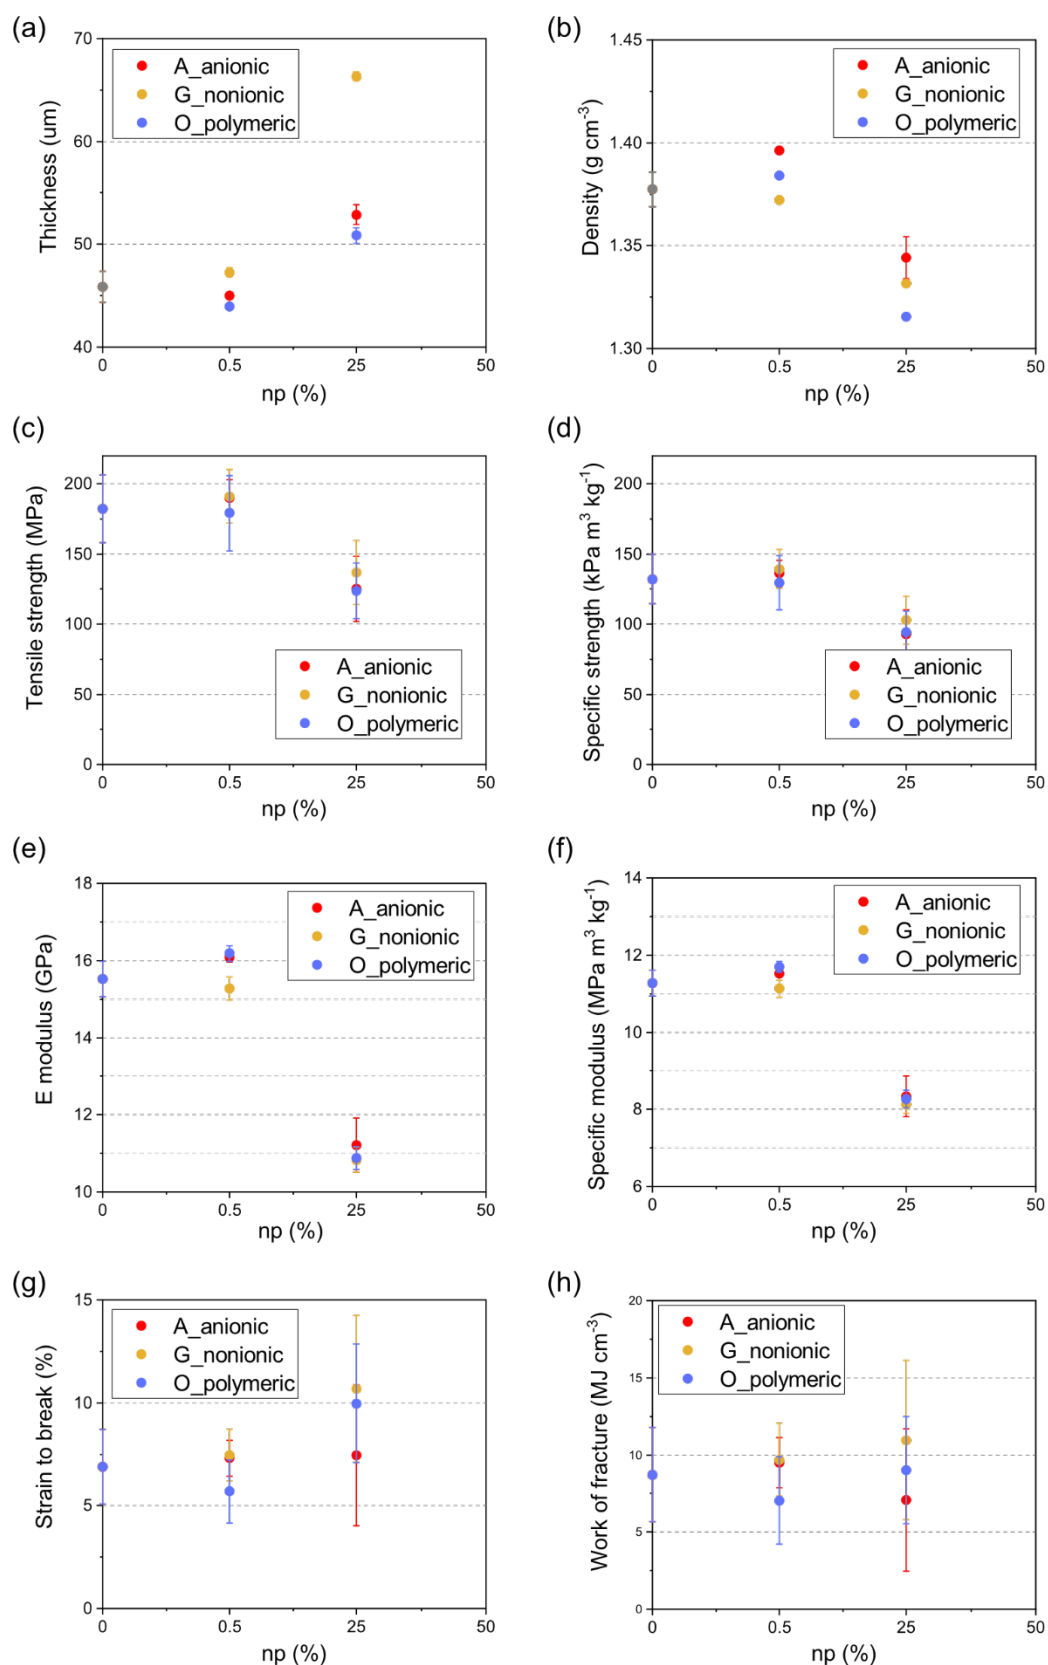

**Figure S17.** Characterization of hybrid nanopapers. (a) thickness and (b) density. (c,d) Tensile strength and specific strength, (e,f) Young's modulus and specific modulus, (g) strain at break and (h) toughness / work of fracture.

| Coverage (%) |      |
|--------------|------|
| CNF_A_0.5    | 0.1  |
| CNF_A_25     | 4.4  |
| CNF_G_0.5    | 0.2  |
| CNF_G_25     | 10.2 |
| CNF_O_0.5    | 0.1  |
| CNF_O_25     | 8.8  |

*Figure S18. Theoretical surface coverage of CNFs by nanoparticle additives*
